# Supplementary material for: Preoxidation-assisted nitrogen enrichment strategy to decorate porous carbon spheres for catalytic adsorption/oxidation of methyl mercaptan
Source: Royal Society of Chemistry journal article supplement (doi:10.1039/d0ra07375j), 2020-01-01

### Figure captions

Fig.S1. (a) N<sub>2</sub> adsorption-desorption isotherms and (b) DFT pore size distribution .

Fig. S1

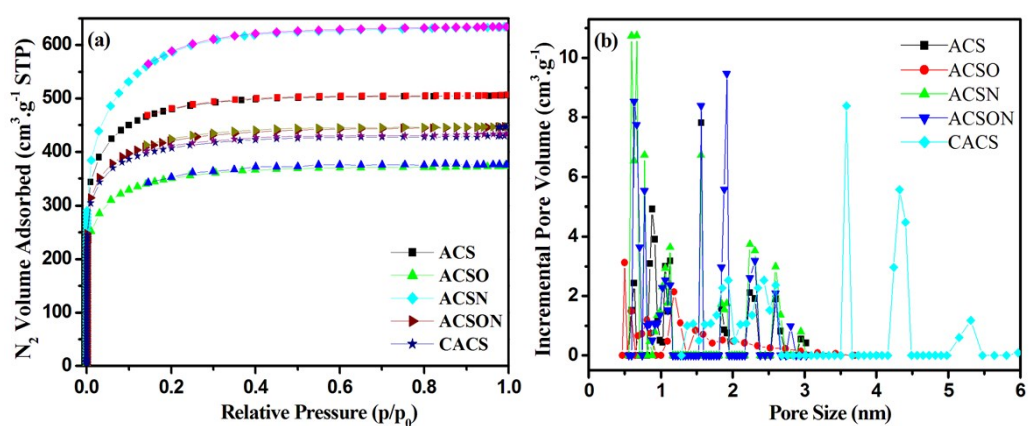

Supplement: d0ra07375j1.pdf [file d0ra07375j1.pdf]
